# Supplementary material for: Effects of Environmental Changes on Gerromorpha (Heteroptera: Hemiptera) Communities from Amazonian Streams
Source: MDPI journal article supplement (doi:10.3390/hydrobiology1010008), 2022-02-15
Supplement: s1 [file s1]

Supplementary Materials

**Table S1.** Description of the sets of variables used in data analysis.

| Variables                             | Mean   | Standard Deviation (SD) |
|---------------------------------------|--------|-------------------------|
| <b>Physiochemical</b>                 |        |                         |
| Dissolved Oxygen mg/l                 | 4.51   | 1.16                    |
| Electrical Conductivity $\mu$ S       | 31.94  | 13.54                   |
| Temperature $^{\circ}$ C              | 25.38  | 1.32                    |
| pH                                    | 5.39   | 1.03                    |
| <b>Local Habitat</b>                  |        |                         |
| Habitat integrity index               | 0.64   | 0.16                    |
| Great shelter                         | 7.81   | 7.37                    |
| Natural shelter                       | 37.31  | 26.42                   |
| Full shelter                          | 37.57  | 26.42                   |
| Aquatic Plant                         | 10.11  | 17.40                   |
| Wood Big                              | 3.99   | 5.64                    |
| Wood Small                            | 16.87  | 14.15                   |
| Live tree                             | 22.17  | 16.97                   |
| Overhanging Vegetation                | 12.89  | 10.05                   |
| Substrate SD                          | 326.35 | 704.81                  |
| Substrate mean                        | 143.21 | 436.72                  |
| Mean of Woody Cover                   | 71.77  | 29.35                   |
| Mean of Total Cover                   | 15.56  | 11.26                   |
| Canopy Average + Intermed. Woody      | 80.52  | 26.53                   |
| Canopy Average + Intermed.            | 16.04  | 21.80                   |
| Land Cover Average                    | 7.08   | 10.26                   |
| Intermed Coverage Average             | 20.11  | 21.30                   |
| Canopy Coverage Average               | 28.56  | 18.51                   |
| Average Exposed Soil                  | 18.47  | 14.75                   |
| Average Herbs                         | 22.10  | 13.14                   |
| Woody Crawling Average                | 34.23  | 25.20                   |
| Herbs Subbow Average                  | 11.76  | 14.57                   |
| Woody Understory Average              | 27.18  | 30.90                   |
| Average Canopy Small Trees            | 47.02  | 20.97                   |
| Average Canopy Big Trees              | 56.33  | 18.76                   |
| Canopy SD % Margin                    | 74.21  | 44.77                   |
| Canopy mean % Margin                  | 55.74  | 45.99                   |
| Canopy SD % Channel                   | 130.54 | 41.49                   |
| Canopy mean % Channel                 | 77.84  | 56.44                   |
| <b>Landscape</b>                      |        |                         |
| % Primary Forest                      | 69.63  | 27.30                   |
| % Mature Forest                       | 71.31  | 27.21                   |
| % Secondary forest                    | 12.12  | 10.71                   |
| % Young Secondary Forest              | 10.44  | 10.34                   |
| % Exposed Soil                        | 18.24  | 20.06                   |
| % Primary forest and Riparian         | 62.50  | 30.29                   |
| % Mature Forest and Riparian          | 64.66  | 29.43                   |
| % Secondary Forest and Riparian       | 16.34  | 16.13                   |
| % Secondary Young Forest and Riparian | 14.17  | 14.80                   |
| % Exposed Soil and Riparian           | 21.15  | 20.71                   |
| % Primary Local Forest                | 38.20  | 43.29                   |
| % Matura Local Forest                 | 40.55  | 43.00                   |
| % Secondary Local Forest              | 24.51  | 28.17                   |
| % Secondary Young Local Forest        | 22.17  | 26.14                   |
| % Expose Local Soil                   | 37.28  | 34.70                   |
